# Supplementary material for: Enhancement in the initiating activity of chalcones via a long-alkyl chain strategy for free radical photopolymerization and 3D printing
Source: Royal Society of Chemistry journal article supplement (doi:10.1039/d4py00380b), 2024-01-01
Supplement: d4py00380b1.pdf [file d4py00380b1.pdf]

## Enhancement in the initiating activity of chalcone via long-alkyl chain strategy for free radical photopolymerization and 3D printing

Jingfang Li<sup>a,\*</sup>, Qilu Deng<sup>a</sup>, Xianju Zhou<sup>a</sup>, Wenjie Li<sup>b</sup>, Xiaoqun Zhu<sup>b,c</sup>, Jun Nie<sup>b,c</sup>

a. School of Science, Chongqing University of Posts and Telecommunications, Chongqing 400065, China

b. State Key Laboratory of Chemical Resource Engineering, Beijing Laboratory of Biomedical Materials, Beijing  
University of Chemical Technology, Beijing, 100029, China

c. Jiangsu Jicui Photosensitive Electronic Materials Research Institute limited company, Jiangsu, 214201, China

Corresponding Authors\*

E-mail: [lijf@cqupt.edu.cn](mailto:lijf@cqupt.edu.cn)

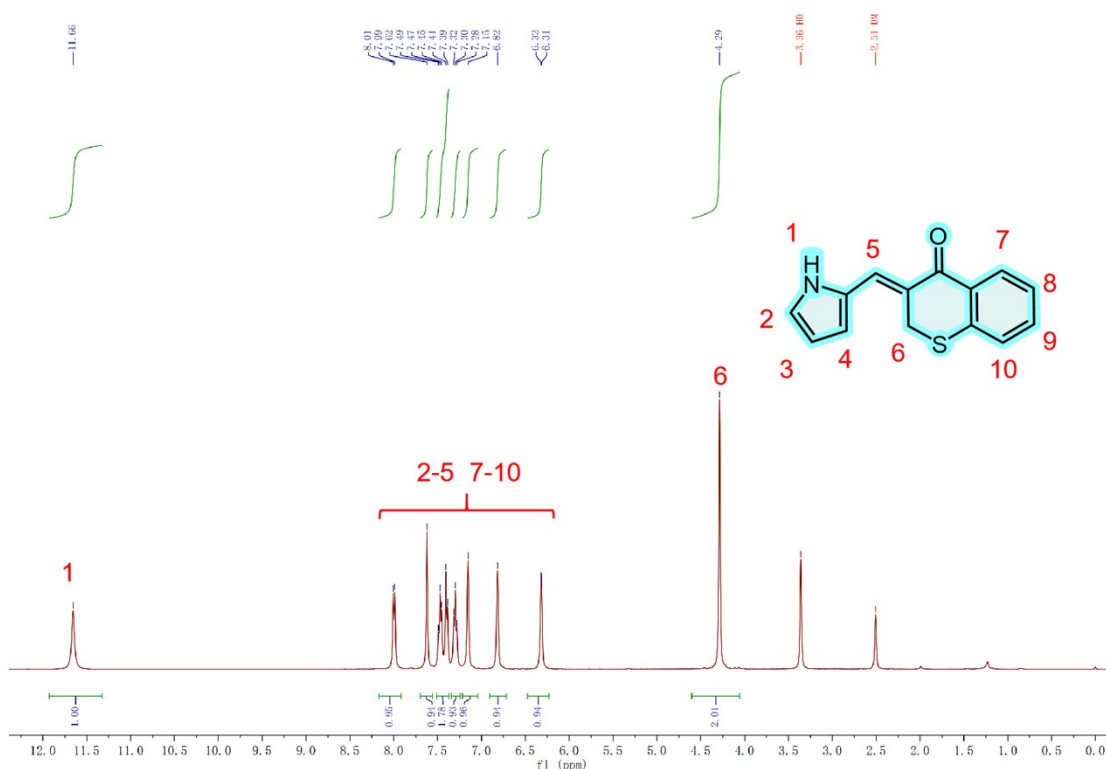

Fig.S1 <sup>1</sup>H-NMR spectrum of E-HMTO(DMSO-d<sub>6</sub>)

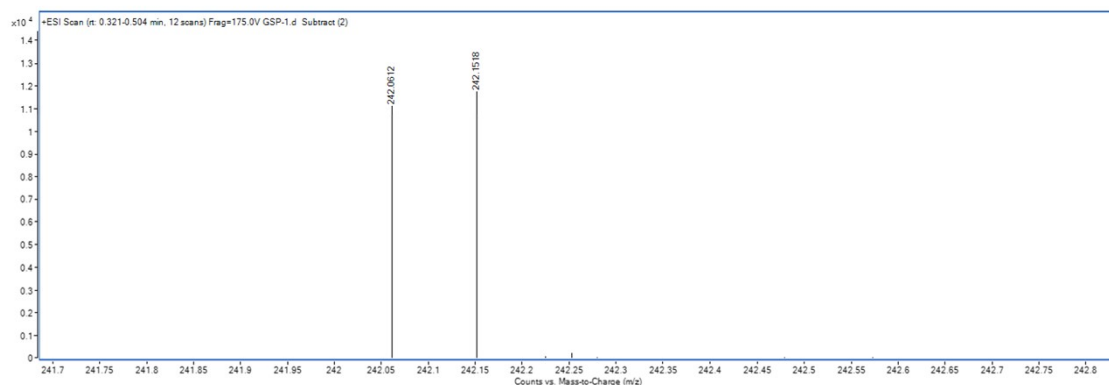

Fig.S2 HRMS spectrum of E-HMTO

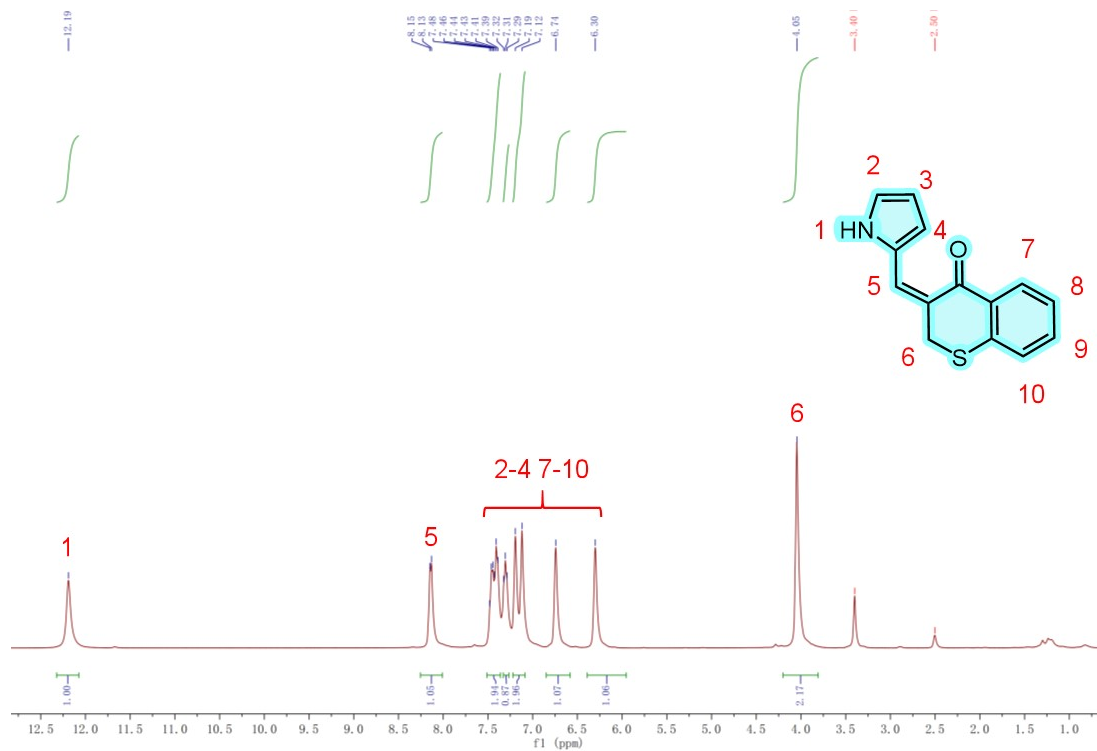

**Fig.S3**  $^1\text{H-NMR}$  spectrum of Z-HMTO(DMSO- $d_6$ )

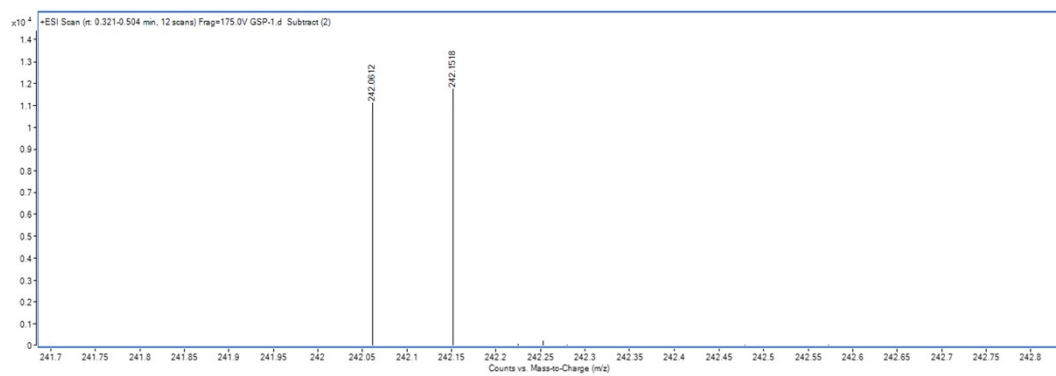

**Fig.S4** HRMS spectrum of Z-HMTO

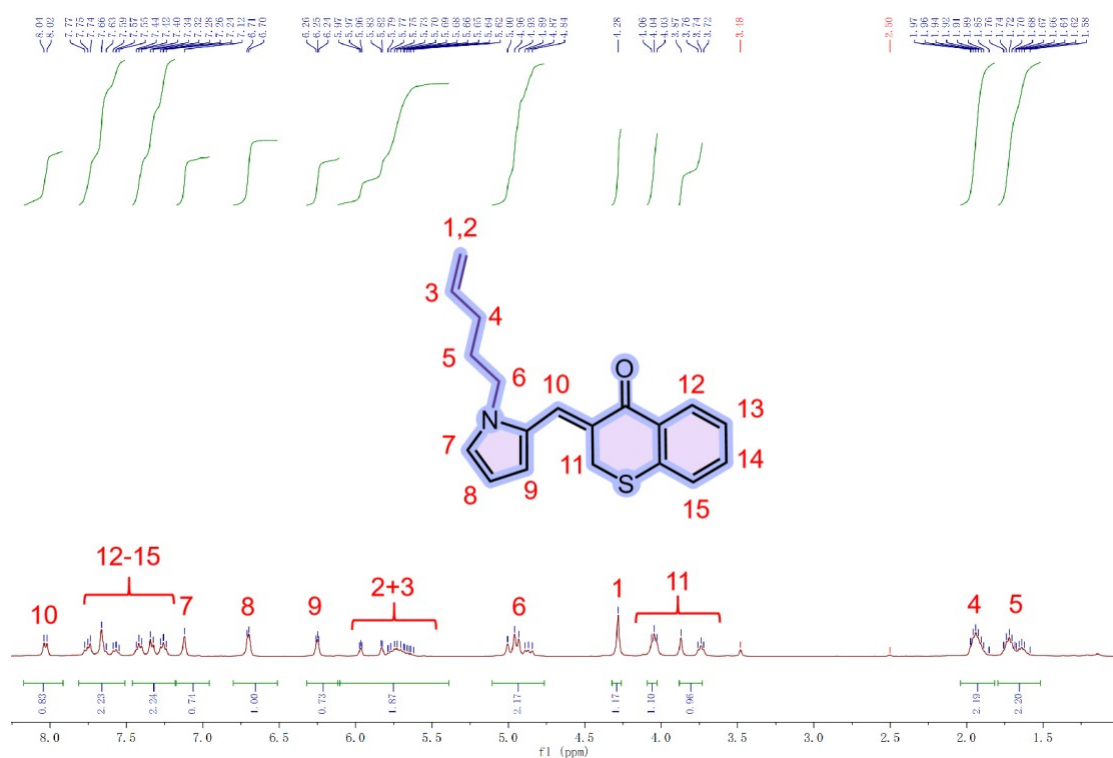

Fig.S5 <sup>1</sup>H-NMR spectrum of E-PHMTO(DMSO-*d*<sub>6</sub>)

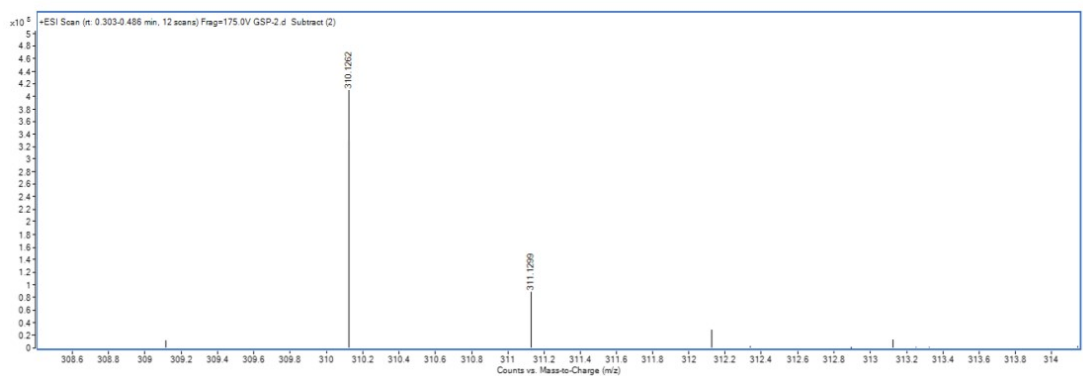

Fig.S6 HRMS spectrum of E-PHMTO

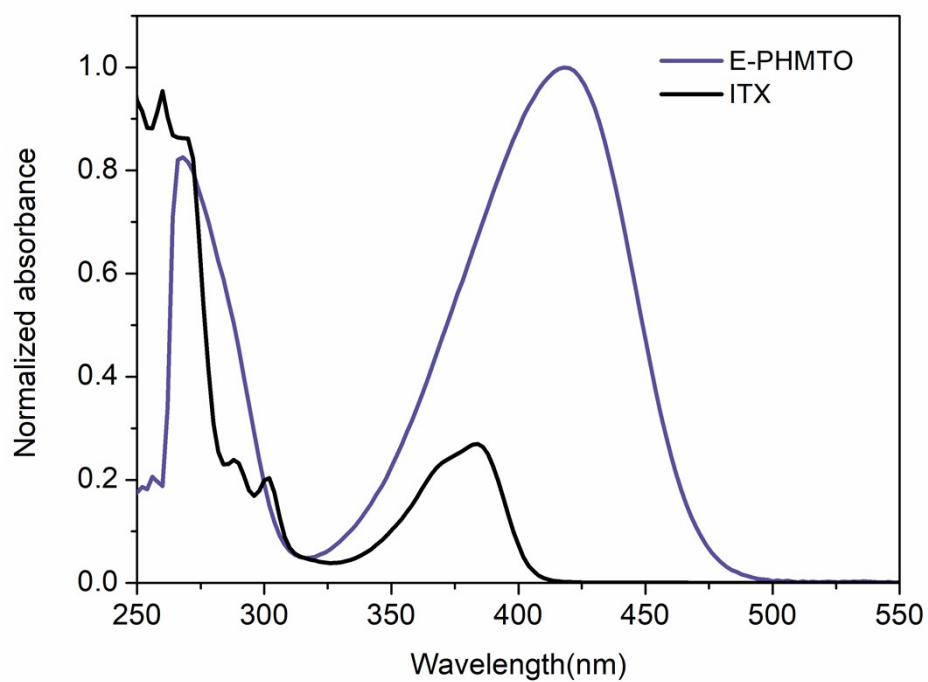

Fig.S7 Normalized UV-vis absorption spectra of E-PHMTO and ITX in the solution of acetonitrile

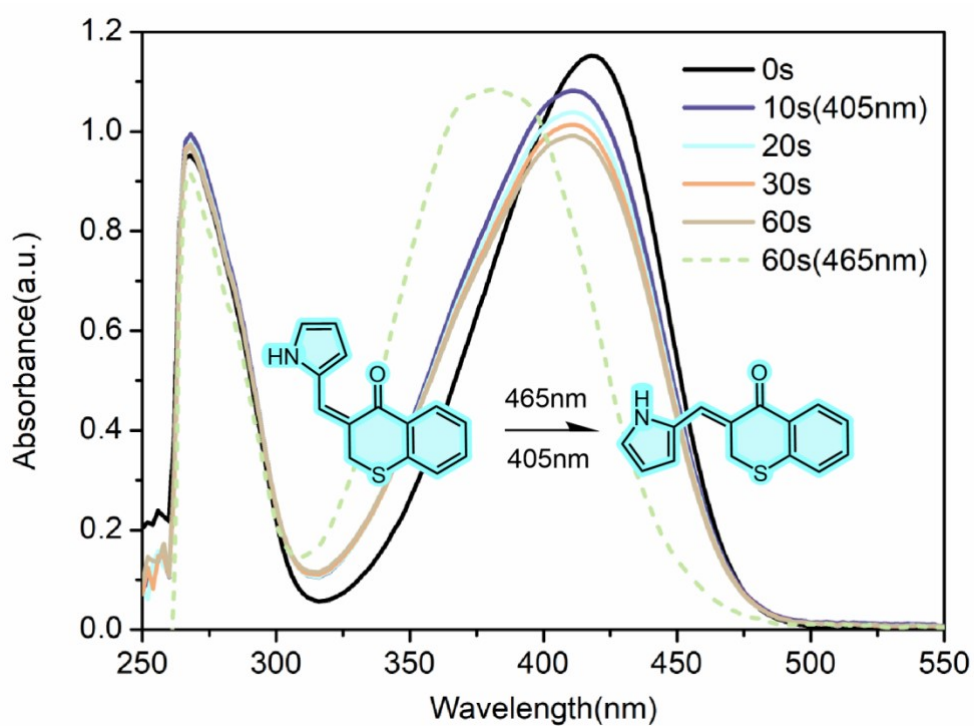

Fig.S8 Steady state photolysis experiments of Z-HMTO( $6.3 \times 10^{-4}$  mol/L) in the absence of coinitiator TEA

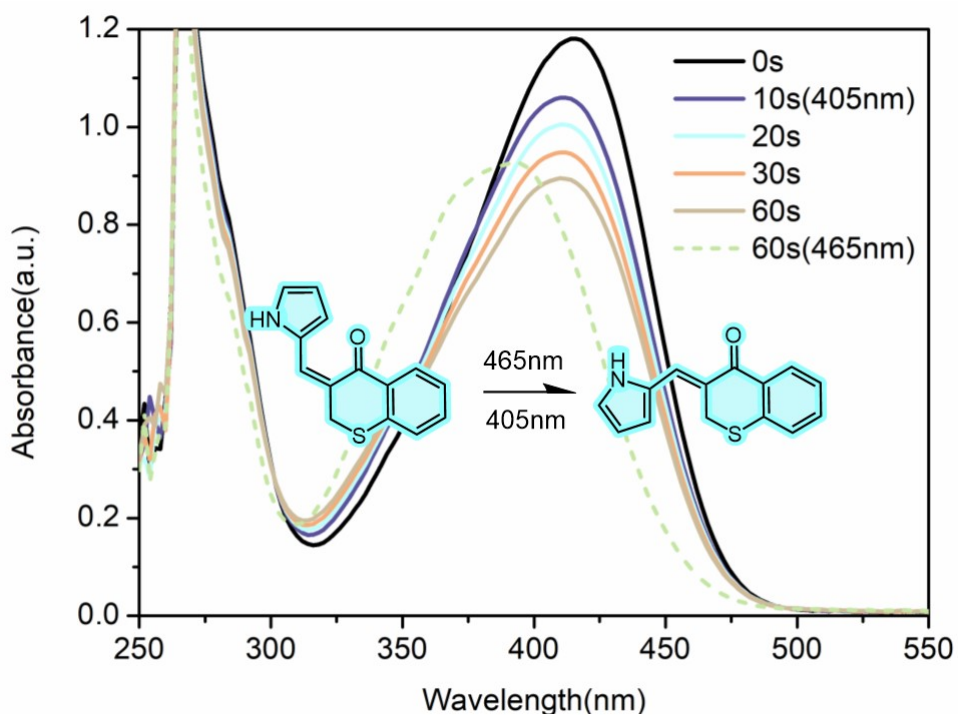

**Fig.S9** Steady state photolysis experiments of Z-HMTO( $6.3 \times 10^{-4}$  mol/L) in the presence of coinitiator TEA

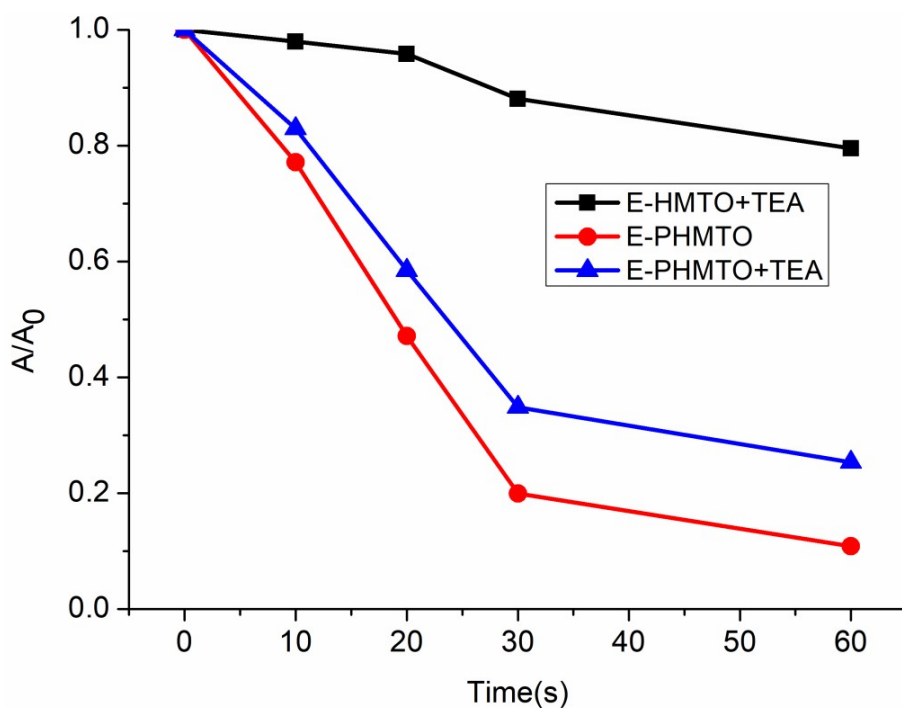

**Fig.S10** Steady state photolysis kinetics of initiating system E-HMTO/TEA, E-PHMTO, E-PHMTO/TEA, which is corresponding to the photolysis results Fig.3(b)(c)(d)

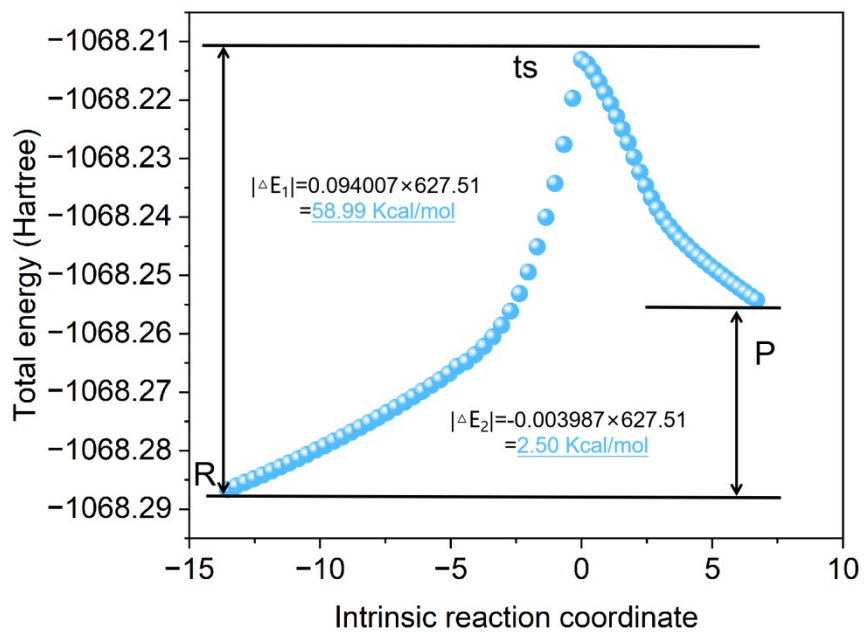

**Fig.S11** Intrinsic reaction coordinate(IRC) calculation result of E-HMTO converting into Z-HMTO

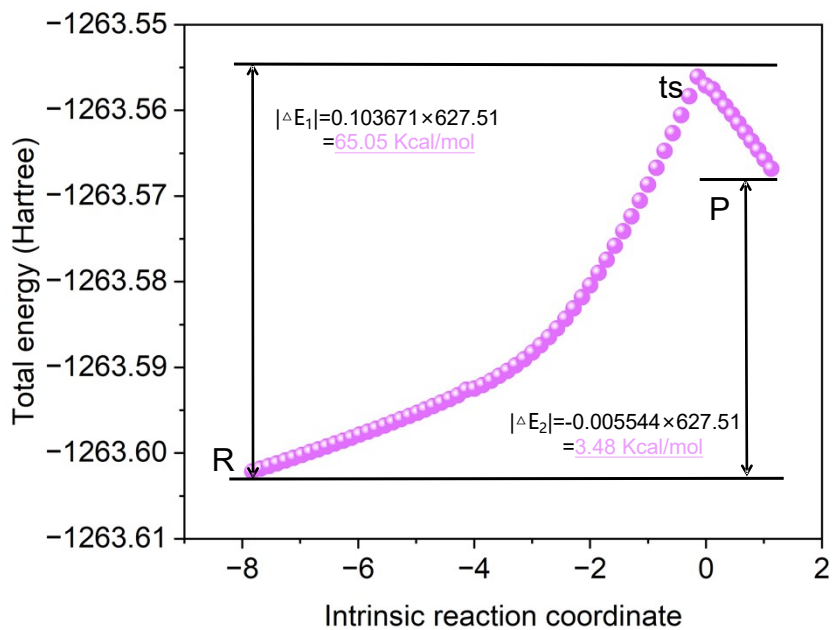

**Fig.S12** Intrinsic reaction coordinate(IRC) calculation result of E-PHMT0 converting into Z-PHMT0
